# Supplementary material for: Electrocardiographic features of immune checkpoint inhibitor associated myocarditis
Source: HighWire-hosted journal article supplement (doi:10.1136/jitc-2020-002007), 2021-03-01
Supplement: jitc-2020-002007supp001_data_supplement.pdf [file jitc-2020-002007supp001_data_supplement.pdf]

## SUPPLEMENTAL MATERIAL

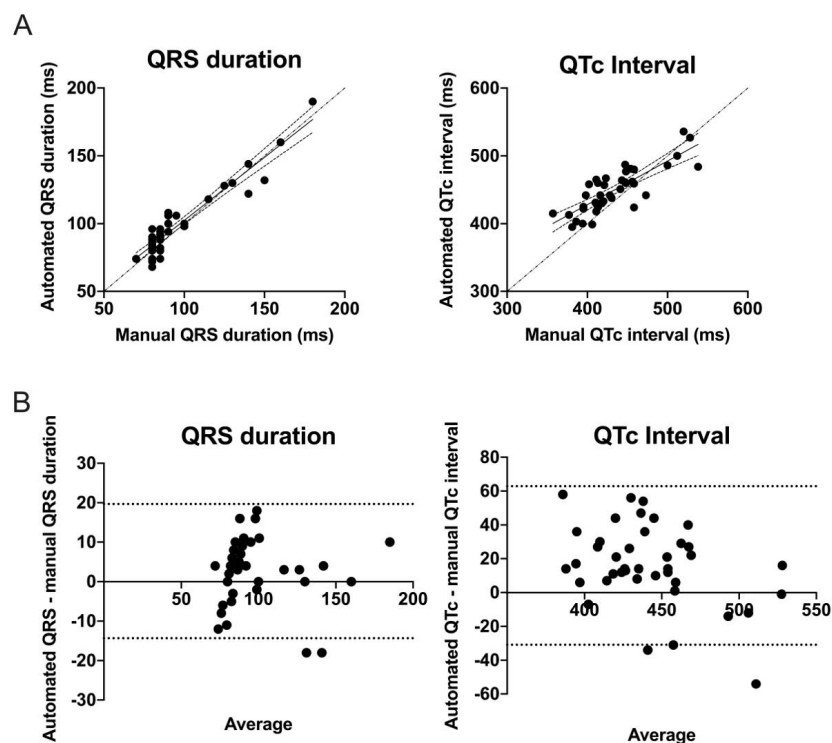

**Supplemental Figure 1. Relationship between automated and manual ECG measurements.**

40 ECGs (20 from controls and 20 from cases at time of myocarditis) were randomly selected and a blinded reader manually measured the QRS duration and QTc interval. (A) Scatter-plots of manual vs automated QRS duration (left) and QTc interval measurements (right). Each dot represents a single ECG. The line of linear regression (solid line) and its 95% CI is shown (dashed line), along with the line of identity (alternating dashes/dots line). The slope of the linear regression line for the QRS data was 0.93 (95% CI 0.82 to 1.04), and for QTc data was 0.64 (95% CI 0.50 to 0.79). (B) Bland-Altman plots depicting the same data. The dotted lines represent the 95% limits of agreement. QRS measurements showed a bias of +2.7 ms towards the automated values (95% limits of agreement -14.3 to 19.7); the QTc measurements showed a bias of +16 ms towards the automated values (95% limits of agreement -30.9 to 62.9).

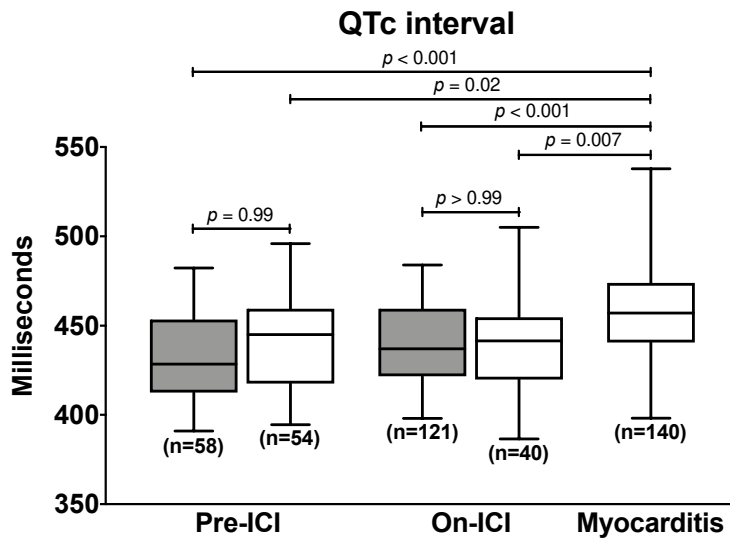

**Supplemental Figure 2. QTc interval changes (corrected by Bazett) with ICI myocarditis.**

QTc interval values were derived from ECGs obtained pre-ICI therapy (“Pre-ICI”), after initiating ICI therapy (“On-ICI”), or at the time of myocarditis (for cases only; “Myocarditis”). Shown are box-and-whisker plots with the central line indicating the median value, the margins of the box indicating the 25<sup>th</sup>/75<sup>th</sup> percentiles, and the whiskers indicating the 5<sup>th</sup>/95<sup>th</sup> percentiles.

|                        | QRS duration (ms) |      |      | $\Delta$ QRS (ms) |      |      |
|------------------------|-------------------|------|------|-------------------|------|------|
|                        | >110              | >120 | >130 | >10               | >20  | >30  |
| <b>Sensitivity (%)</b> | 48.6              | 27.9 | 16.4 | 51.7              | 31.0 | 21.6 |
| <b>Specificity (%)</b> | 87.0              | 90.1 | 92.6 | n/a               | n/a  | n/a  |

**Supplemental Table 1. Sensitivities and specificities of QRS duration towards the diagnosis of myocarditis.** QRS duration was measured at time of diagnosis of myocarditis.  $\Delta$ QRS is equal to the QRS duration at time of myocarditis minus the QRS duration at baseline prior to myocarditis.

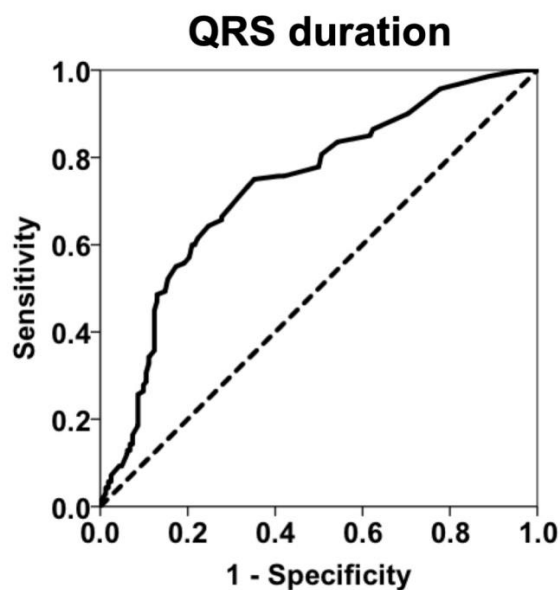

**Supplemental Figure 3. Receiver operating characteristic (ROC) curve.** (A) ROC curve for QRS duration towards the diagnosis of ICI myocarditis for all patients in the myocarditis cohort. Area under the curve is 0.73.

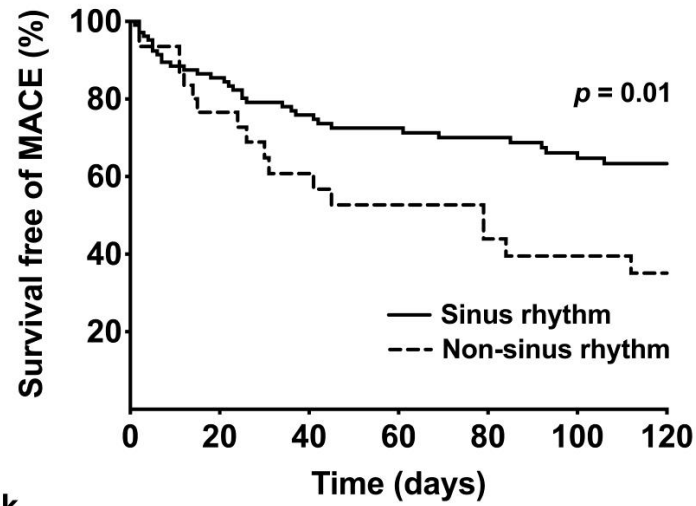

| Number at risk          |  | Time (days) |    |    |    |    |     |     |
|-------------------------|--|-------------|----|----|----|----|-----|-----|
|                         |  | 0           | 20 | 40 | 60 | 80 | 100 | 120 |
| <b>Sinus rhythm</b>     |  | 108         | 82 | 70 | 61 | 54 | 48  | 42  |
| <b>Non-sinus rhythm</b> |  | 32          | 20 | 15 | 12 | 10 | 9   | 8   |

**Supplemental Figure 4. Association between rhythm at presentation and MACE risk.**

Kaplan-Meier curves indicate the occurrence of MACE over 120 days from time of diagnosis for myocarditis patients stratified by type of rhythm at presentation.

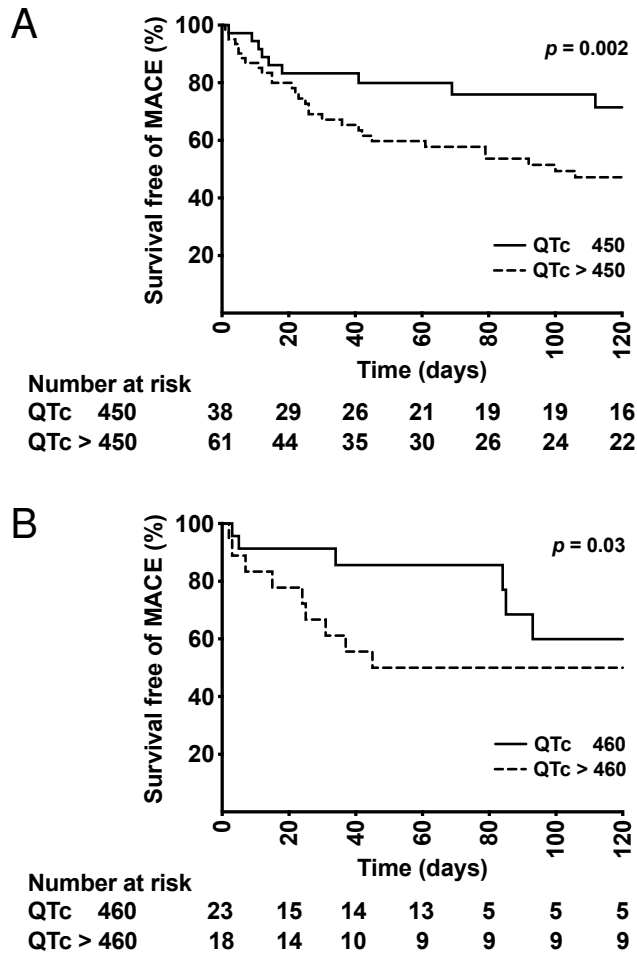

**Supplemental Figure 5. Association between QTc interval (corrected by Bazett) and MACE risk.** Kaplan-Meier curves indicate the occurrence of MACE over 120 days from time of diagnosis for male (A) and female (B) myocarditis cases stratified by QTc interval at presentation.
